# Supplementary material for: C20D3-Vitamin A Prevents Retinal Pigment Epithelium Atrophic Changes in a Mouse Model
Source: PubMed Central journal article supplement — Transl Vis Sci Technol. 2021 Dec 8;10(14):8. doi: 10.1167/tvst.10.14.8 (PMC8662574; doi:10.1167/tvst.10.14.8), 2021-12-08
Supplement: tvst-10-14-8_s001.pdf [file tvst-10-14-8_s001.pdf]

# C20D<sub>3</sub>-Vitamin A Prevents Retinal Pigment Epithelium Atrophic Changes In A Mouse Model

Dan Zhang,<sup>1</sup> Kiera Robinson,<sup>1</sup> and Ilyas Washington<sup>1,2</sup>

<sup>1</sup>Columbia University Medical Center, Ophthalmology, New York, NY, USA

<sup>2</sup>biOOrg3.14, Buffalo, WY, USA

## SUPPLEMENTAL MATERIAL

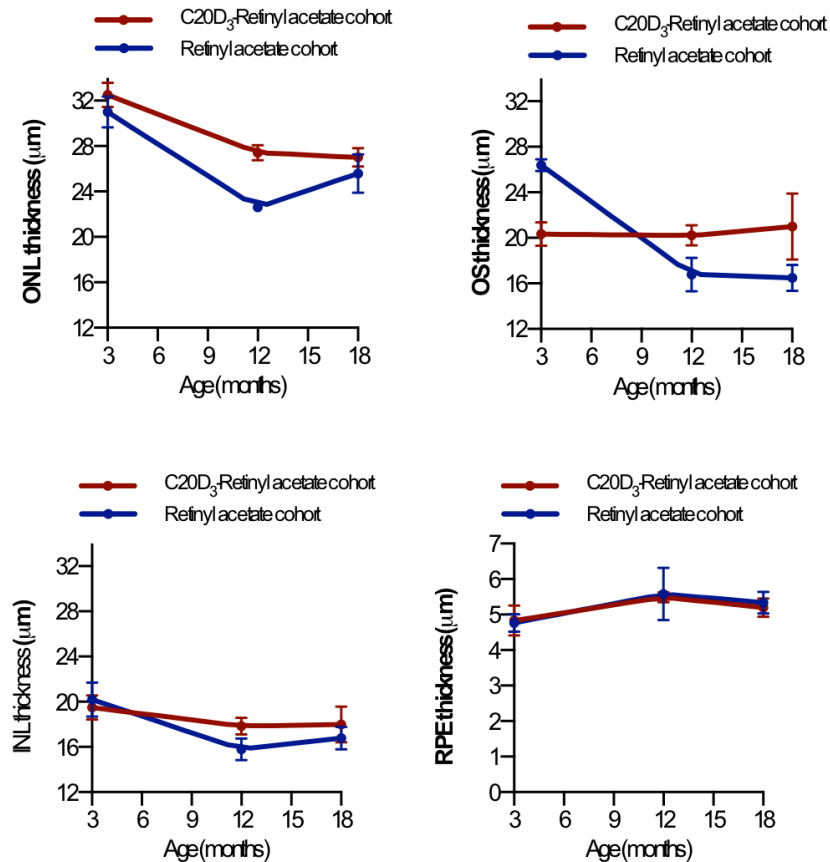

### Supplemental Figure 1

Retinal layer thickness, measured 1 mm from either side of the optic nerve head, in *Abca4*<sup>-/-</sup>/*Rdh8*<sup>-/-</sup> mice administered a diet containing vitamin A as either retinyl acetate or C20D<sub>3</sub>-retinyl acetate. Averages and SEM are shown. C20D<sub>3</sub>-retinyl acetate: n = 6 at 3 months, n = 14 at 12 months, and n = 4 at 18 months. Retinyl acetate: n = 5 at 3 months, n = 5 at 12 months and n = 10 at 18 months. Each eye was from a different animal.

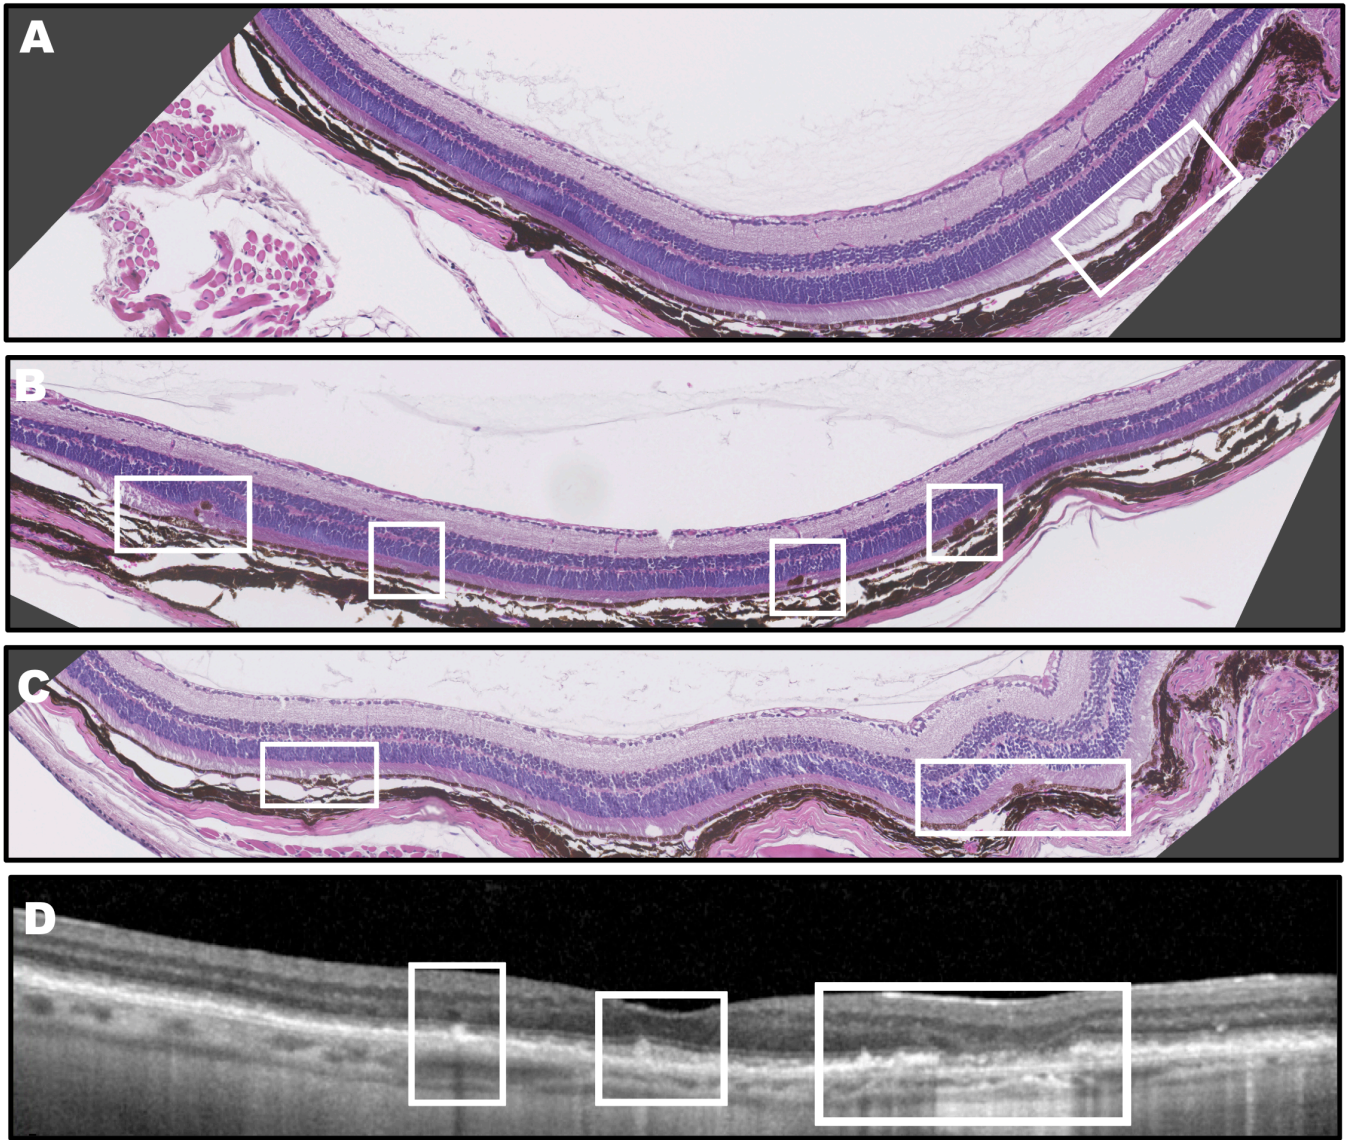

### Supplemental Figure 2

(A-C) Representative H&E cross-sections of 18-month-old *Abca4*<sup>-/-</sup>/*Rdh8*<sup>-/-</sup> control animals administered vitamin A as retinyl acetate. Each panel represents a slice from a different eye. Focal RPE atrophic changes (boxed) were observed in all eyes examined. Areas without focal RPE pathology appeared relatively normal.

(D) Representative OCT cross-section of a human eye with AMD. Similarly, focal RPE atrophic changes (boxed) are observed, while areas away from the RPE pathology appear relatively normal.
